# Supplementary material for: Reevaluation of Fatty Acid Receptor 1 as a Drug Target for the Stimulation of Insulin Secretion in Humans
Source: PubMed Central journal article supplement — Diabetes. 2013 May 17;62(6):2106–11. doi: 10.2337/db12-1249 (PMC3661642; doi:10.2337/db12-1249), 2013-05-17

SUPPLEMENTARY DATA

**Supplementary Table 1.** Minor allele frequency (MAF) and p for Hardy-Weinberg equilibrium (HWE p) of genotyped SNPs. The SNP rs10423648 failed Hardy-Weinberg equilibrium, and therefore was not analyzed in the genotype-phenotype association study.

| <b>SNP</b>        | <b>MAF</b> | <b>HWE (p)</b> |
|-------------------|------------|----------------|
| <b>rs1573611</b>  | 0.27       | 0.51           |
| <b>rs387083</b>   | 0.31       | 0.08           |
| <b>rs2301151</b>  | 0.20       | 0.12           |
| <b>rs12975589</b> | 0.46       | 0.71           |
| <b>rs12462800</b> | 0.06       | 0.93           |
| <b>rs10423648</b> | 0.06       | 0.02*          |
| <b>rs10422744</b> | 0.41       | 0.54           |
| <b>rs417030</b>   | 0.24       | 0.70           |

## SUPPLEMENTARY DATA

**Supplementary Figure 1.** Concentration-dependent effects of TUG-469 and TUG-761 in hFFAR1 expressing HEK cells. HEK293 expressing the human FFAR1 receptor were stimulated with the indicated concentrations of FFAR1-agonist TUG-469 and FFAR1-antagonist TUG-761 and accumulation of IP1 (inositol-1-phosphate) as measure of G-protein coupled PLC activity was recorded (for method see ref. S1). Untransfected HEK cells and HEK cells transfected with FFAR2 or FFAR3 respond neither to TUG-469 nor to TUG761 (data not shown). S1. Schmidt J, Smith NJ, Christiansen E, et al. Selective orthosteric free fatty acid receptor 2 (FFA2) agonists: Identification of the structural and chemical requirements for selective activation of FFA2 versus FFA3. *J Biol Chem.* 2011;286:10628-40.

A

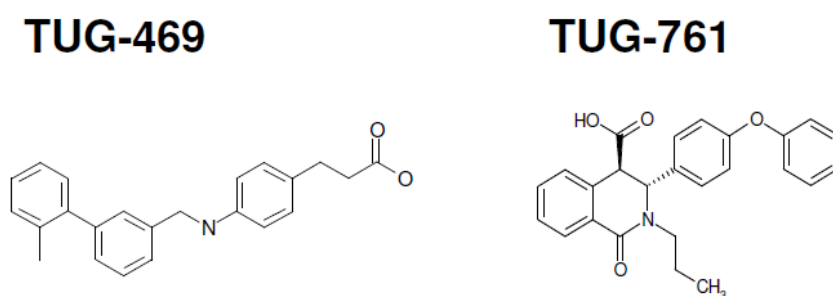

B

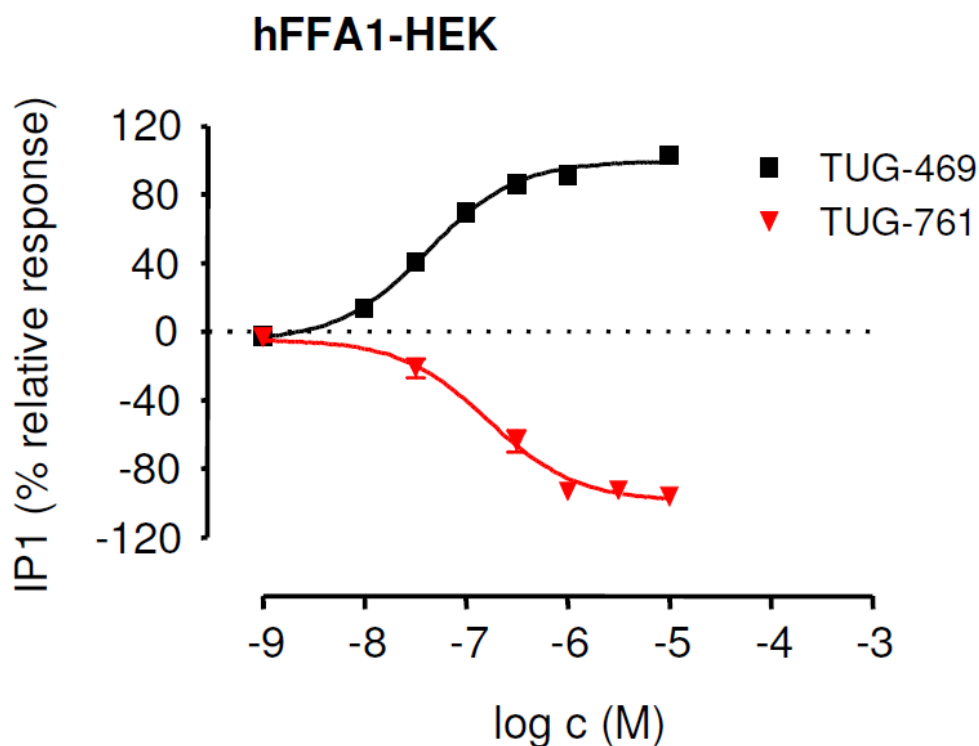

SUPPLEMENTARY DATA

**Supplementary Figure 2.** Localization of the SNP rs1573611 in the *FFAR1* locus as downloaded from <http://genome.ucsc.edu/index.html>. ChIP-Seq analyses of transcription-factor binding and digital DNase hypersensitivity cluster data indicate that rs1573611 is situated amidst an important cis-regulatory region (Encode project consortium, A user's guide to the encyclopedia of DNA elements (ENCODE). PLoS Biol 2011; 9(4):e1001046).

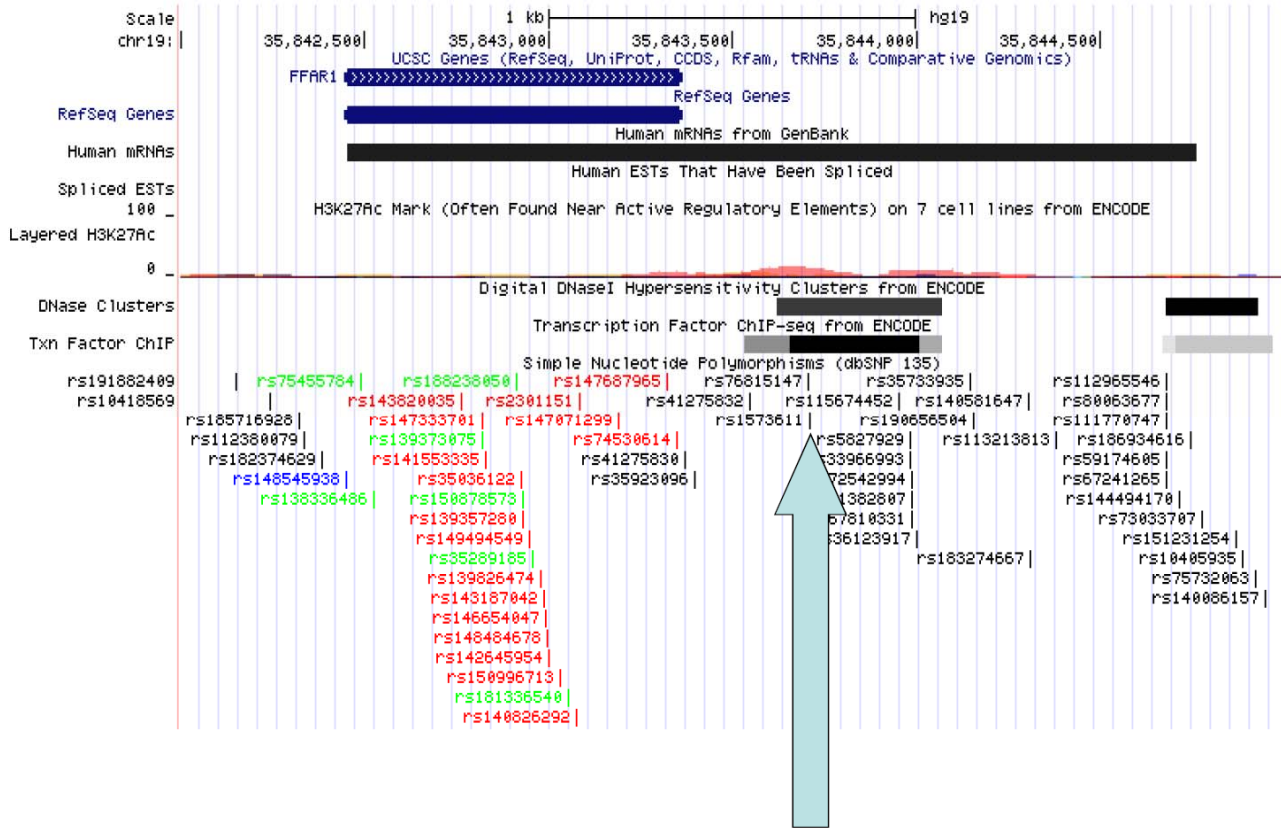

SUPPLEMENTARY DATA

**Supplementary Figure 3.** FFAR1 protects against palmitate-induced beta-cell death. WT (A) and FFAR1-KO (B) mouse islet cells were incubated with test substances as indicated and described under Research Design and Methods. Results are expressed as means  $\pm$  SEM of n = 3 - 5 independent experiments. \* (p<0.05) indicates significance to control culture condition in the presence of 1.2% FCS; § (p<0.05) indicates significance to palmitate.

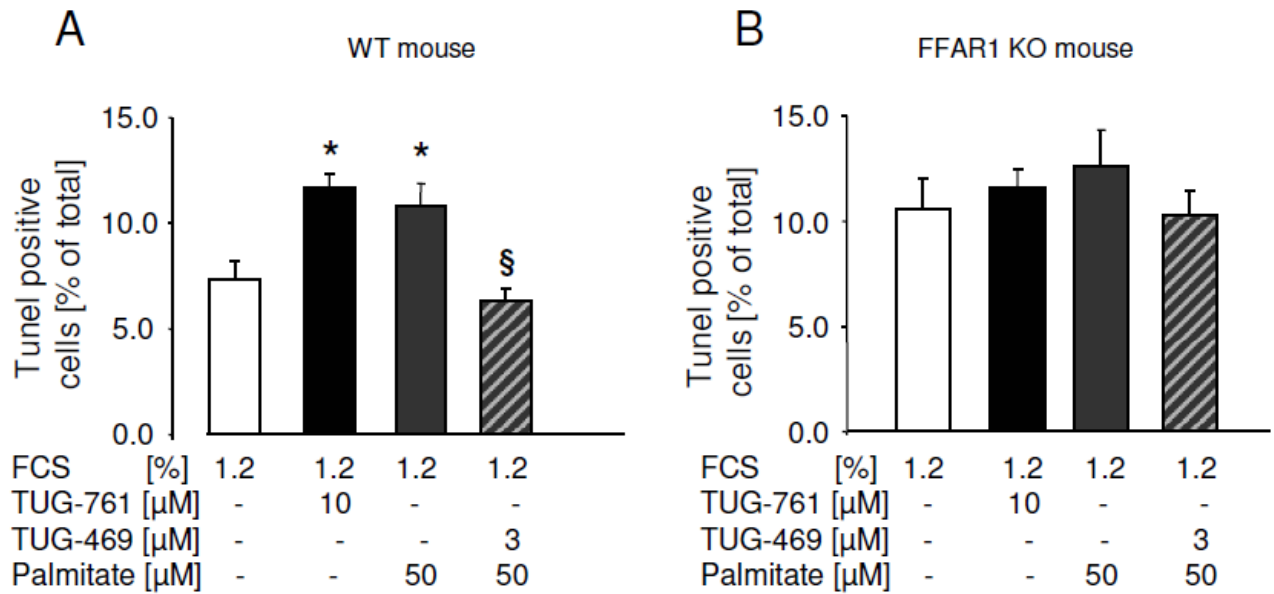

Supplement: supp_db12-1249_DB121249SupplementaryData.pdf [file supp_db12-1249_DB121249SupplementaryData.pdf]
